# Supplementary material for: Impact of individual and treatment characteristics on wearable sensor-based digital biomarkers of opioid use
Source: PubMed Central journal article supplement (PMC9395337; doi:10.1038/s41746-022-00664-z), 2022-08-22
Supplement: 41746_2022_664_MOESM1_ESM.pdf [file 41746_2022_664_MOESM1_ESM.pdf]

| Sensor data stream     | Feature             | F Value |
|------------------------|---------------------|---------|
| Heart Rate             | Maximum             | 2.72    |
|                        | Mean                | 2.56    |
|                        | SD                  | 2.40    |
| Skin Temperature       | Maximum             | -3.04   |
|                        | Standard Deviation  | -3.90   |
|                        | Interquartile Range | -3.15   |
| Electrodermal Activity | Minimum             | 3.26    |
|                        | Skew                | -4.90   |
|                        | Kurtosis            | -5.50   |
| Accelerometry          | Minimum             | 3.40    |
|                        | Mean                | 3.00    |
|                        | Mean Frequency      | -3.50   |
|                        | SD Frequency        | -3.06   |
| Interbeat Interval     | NN50                | 2.17    |
|                        | pNN50               | 2.17    |
|                        | SDNN                | 2.18    |
|                        | VLF                 | -2.15   |
|                        | LF                  | -2.66   |
|                        | LF (nu)             | -2.50   |

Supplementary Table 1: Features Calculated from Raw Sensor Data with Statistically Significant Changes from Pre- to Post-Opioid Administration

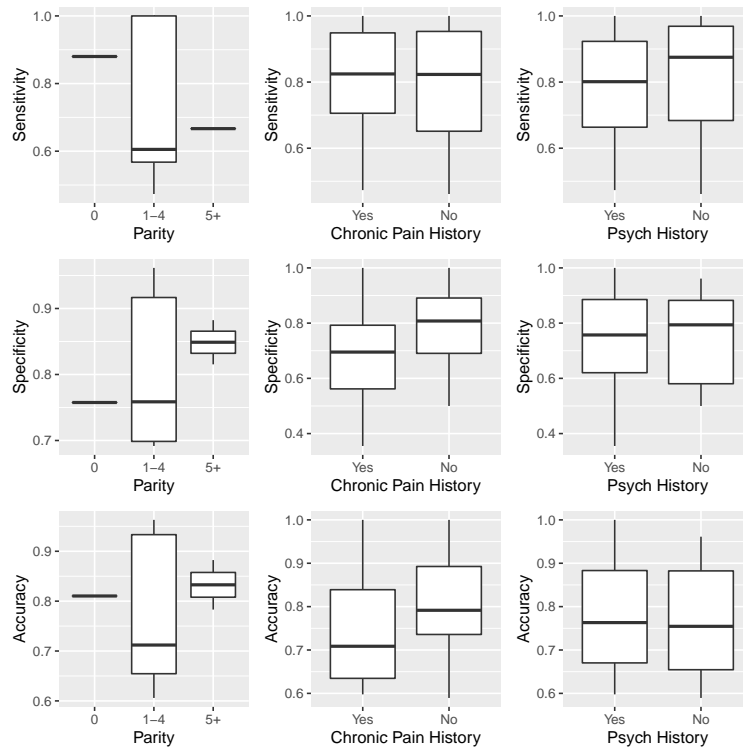

Supplementary Figure 1: Model Metrics Stratified by Additional Demographic Characteristics

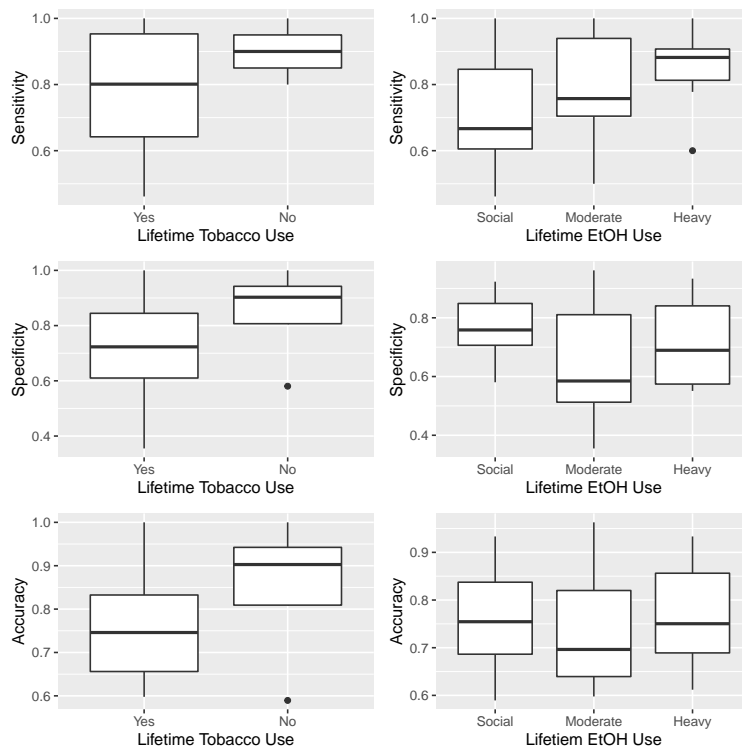

Supplementary Figure 2: Model Metrics Stratified by Lifetime EtOH and Tobacco Use

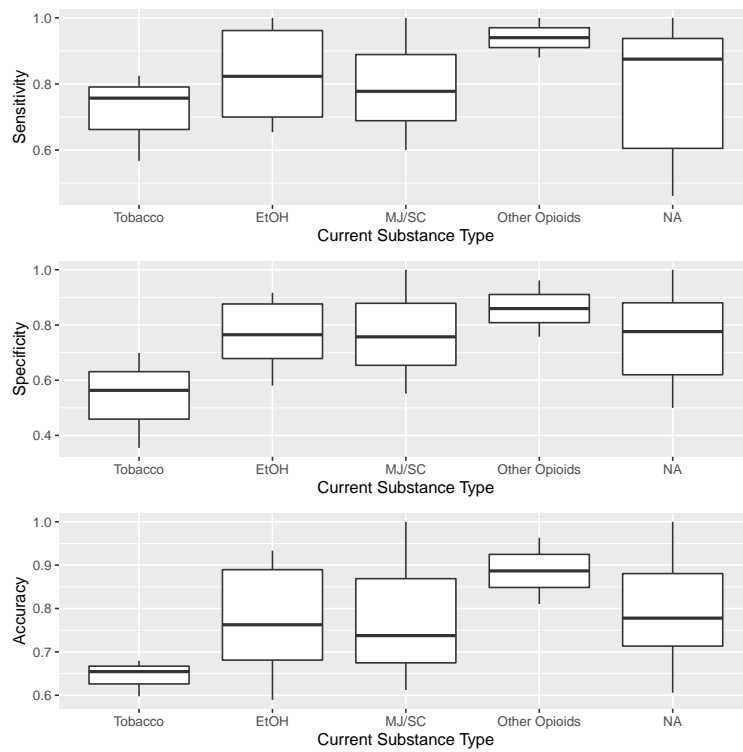

Supplementary Figure 3: Model Metrics Stratified by Current Substance Use Type
